## Current Bibliography.

Prepared by the Editor with the assistance of Miss Thursby-Pelham.

**N**OTE. The scope of the Bibliography is limited in the main to the area covered by the Council's activities, but there are included papers of general interest relating to other areas in the North Temperate and Arctic regions and exceptionally elsewhere. Limnological references are not as a rule given, but papers relating to brackish waters and to salmon and freshwater fish studied by the Council are included.

The classification of entries follows in a general way that adopted in Dr. ALLEN's Selected Bibliography published in Vol. I, Nos. 1 and 2 of the Journal, and since reprinted.

Subscribers and those on the distribution list will receive regularly upon application to the Administrative Secretary copies of the Bibliography printed on one side of the page only, for use in making up card indices.

The Editor will be glad to be advised of emendations and additions to the Bibliography.

## Physical and Biological Conditions in the Sea.

### GENERAL HYDROGRAPHY

- ANON. Luftens och Vattnets Temperatur, Vind, Ytström och Bottenström. Fyr-skeppsundersökning. Svenska Hydro-Biol. Komm. År 1927. Göteborg 1928.
- BURKOV, P. I. Auszüge aus den Reiseberichten des Kommandos des Expeditionsschiffes "Persey". Ber. des Wiss. Meeresinst. Moscow, Bd. I, Hft. 1, 59—81, 1928. (In Russian.)
- CONSEIL INTERNATIONAL. Bulletin Hydrographique pour l'année 1927. 1928.
- LE DANOIS, ED. Les Recherches Océanographiques des Pays participants et leur Rapport avec les Travaux du Conseil International. La France. Rapp. et Proc. Verb. XLVII. Rapp. Jubilaire, 135—51, 1928.
- EVERDINGEN, E. VAN. Der Anteil Hollands an den Arbeiten des Central-Ausschusses für Meeresforschung. I. Die hydrographischen Arbeiten. Rapp. et Proc. Verb. XLVII. Rapp. Jubilaire, 205—11, 1928.
- FROMMEYER, M. Die Eisverhältnisse um Spitzbergen und ihre Beziehungen zu klimatischen Faktoren. Ann. der Hydrog. und Marit. Met. LVI, 209—13, 1928.
- KNUDSEN, M. Report on the Danish Hydrographical Investigations. Rapp. et Proc. Verb. XLVII. Rapp. Jubilaire, 128—30, 1928.
- MATTHEWS, D. J. Oceanographic Observations between Greenland and North America. Nature CXXII, 373—75, 1928.
- MAURER, H. Die Emden-Tiefe. Ztschr. Ges. Erdkunde, No. 5/6, 248 et seq., 1928.
- PRANDTL, L. Die Entstehung von Wirbeln in einer Flüssigkeit mit kleiner Reibung (Wilbur Wright — Gedächtnis-Vortrag in der Roy. Aeron. Soc. London). Ztschr. Flugt. u. Motorluftsch. Heft 21, 489—96, 1927.
- RINGER, W. E. Über die Veränderungen in der Zusammensetzung des Meereswasser-salzes beim Ausfrieren. Rapp. et Proc. Verb. XLVII. Rapp. Jubilaire, 226—36, 1928.
- ROSSOLIMO, A. J. On the Hydrography of the Sea of Barents, Petchora Sea. Ber. des Wiss. Meeresinst. Moscow. Bd. III. Lfg. I, 1—100, 1928. (Russian with English Summary.)
- ROUCH, J. La température et les courants de la mer dans l'Antarctique américaine. Bull. de l'Inst. Océan. No. 520, Monaco 1928.
- SUPAN, A. Grundzüge der physischen Erdkunde. Bd. I. Berlin 1927. (In the final chapter, "Das Wasser", Oceanography is dealt with by G. Scott & F. Machalschek.)
- THOMPSON, D'ARCY W. The Geophysical Institute at Bergen. Nature CXXXII, 98—100, 1928.
- THORADE, H. Robert Sterneck. Ann. der Hydrog. und Marit. Met. LVI, 225—26, 1928. (Contains Bibliography).

### Physics and Chemistry of Sea Water.

- CASTENS, G. Über den Einfluss von Temperatur- und Salzgehaltsänderung auf die Druckänderung mit besonderer Berücksichtigung der Verhältnisse im südatlantischen Ozean. Ann. der Hydrog. und Marit. Met. LVI, 280—84, 1928.
- LUMBY, J. R., and CARRUTHERS, J. N. An Experiment dealing with the Interpretation of Salinity Distribution Charts. Journ. du Conseil III, 176—90, 1928.

- MALMGREN, F. On the Properties of Sea-ice. Norwegian North Polar Exp. with the "Maud" 1918—1925, Sci. Res. I, No. 5, Bergen 1927.
- MATTHEWS, D. J., and ELLIS, B. A. The Ratio of Magnesium to Chlorine in the Waters of the Eastern Mediterranean and Gulf of Aden. Journ. du Cons. III, 191—93, 1928.
- RITTER, L. Beiträge zur physikalischen Chemie des Meeres. II. Besondere Kolloid-chemische Probleme in der Biologie des Meeres. Ann. der Hydrog. und Marit. Met. LVI, 214—21, 1928.
- SATKEVICH, A. A. On the Pressure of a liquid on a firm body on which it is poured. Festschrift für Prof. N. M. Knipowitsch, 1885—1925, 57—68, Moscow 1927. (In Russian.)

#### HYDROGEN ION CONCENTRATION AND DISSOLVED GASES

- KOLTHOFF, I. M. Die Pufferlösungen bei der colorimetrischen Bestimmung der Wasserstoffionen-Konzentration. Handbuch der biol. Arbeitsmethoden. Abt. III. T. 1. A. Hft. 7, 1442—62, 1928.
- MISTOWITZER, E. Die Bestimmung der Wasserstoffionenkonzentration von Flüssigkeiten. Julius Springer, Berlin 1928.
- RINGER, W. E. Die Alkalinität des Meereswassers. Rapp. et Proc. Verb. XLVII. Rapp. Jubilaire, 205—11, 1928.

#### Currents.

- CARRUTHERS, J. N. The Flow of Water through the Straits of Dover as gauged by continuous meter observations at the Varne Light Vessel (50°56' N.—1°17' E.). Part I. Methods employed, with a preliminary survey of the Results. Fish. Invs. Series II, Vol. XI, No. I, 1928.
- CARRUTHERS, J. N. New Drift Bottles for the Investigation of Currents in Connection with Fishery Research. Journ. du Cons. III, 194—205, 1928.
- JOHNSTONE, J. The Irish Sea. Hydrography and Weather. Festschrift für Prof. N. M. Knipowitsch, 1885—1925, 47—56. Moscow 1927.
- PETTERSSON, O. Der Golfstrom und der Atlantische Strom, Festschrift für Prof. N. M. Knipowitsch, 1885—1925, 431—47. Moscow 1927.
- PETTERSSON, O. Le système de courants de l'Atlantique septentrional. Rapp. et Proc. Verb. XLVII. Rapp. Jubilaire, 260—71, 1928.
- SCHOTT, G. Die Wasserbewegungen im Gebiete der Gibraltarstrasse. Journ. du Cons. III, 139—75, 1928.
- SVERDRUP, H. U. Die Eistrift im Weddellmeer. Ann. der Hydrog. und Marit. Met. LVI, 265—74, 1928.
- THORAE, H. Neuere Untersuchungen über Turbulenz. Ann. der Hydrog. und Marit. Met. LVI, 201—2, 1928.

#### TIDES

- ADMIRALTY. The Admiralty Tide Tables (Standard Edition). Part I. Containing tidal predictions for standard ports of the world for the year 1929. Hydrographic Dept. Admiralty London 1928.
- ADMIRALTY. Instructions for analysing Tidal Observations. Hydrog. Dept. Admiralty H. M. S. O. London 1928.
- DOODSON, A. T. Application of Numerical Methods of Integration to Tidal Dynamics. Monthly Notices of Roy. Astronomical Soc. Geophysical Suppl. I, No. 10, London 1928.
- DOODSON, A. T. The Analysis of Tidal Observations. Phil. Trans. Roy. Soc. London. A CXXVII, 223—79, 1928.
- PROUDMAN, J. On the Tides in a Flat Semicircular Sea of Uniform Depth. Monthly Notices of Roy. Astronomical Soc. Geophysical Suppl. II. No. 1, London 1928.

#### WIND

- ANON. The Trade Winds. IV. The General Circulation. Marine Observer, V, 228—34, 1928.
- OLEVINSKY, C. R. Résultats des observations météorologiques à bord de "Persey"

bateau de l'Institut Marin Scientifique, lors des expéditions de l'été 1924. Ber. des Wiss. Meeresinst. Moscow, Bd. II, Lfg. 4, 65—82, 1924. (In Russian, French Summary.)

#### Oceanography—Miscellaneous.

- HARDY, A. G. The Work of the Royal Research Ship "Discovery" in the Dependencies of the Falkland Islands. Geographical Journal LXXII, 209—34, London 1928.
- SEYMOUR SEWELL, R. B. A study of recent changes of sea-level based largely on a study of coral-growths in Indian and Pacific Seas. Int. Revue der gesamt. Hydrobiol. u. Hydrog. XX, 89—102, 1928.

#### Plankton.

- DEMEL, K. Délimitation et Régions naturelles de la Baltique. Arch. d'Hydrobiol. et d'Ichthyologie. Suwalki II, 311—20, 1927. (In Polish, French Summary.)
- GRAN, H. H. The conditions of life for plankton in the coastal waters of northern Europe. Rapp. et Proc. Verb. XLVII. Rapp. Jubilaire, 196—204, 1928.
- JASCHNO, W. A. v. Das Zooplankton des Karischen Meeres. Ber. des Wiss. Meeresinst. Moscow, Bd. II, Lfg. 2, 1—50, 1927. (In Russian, German Summary.)
- LEBOUR, M. V. Dinoflagellates. Science Progress XXIII, 124—34, 1928.
- LEBOUR, M. V. The Larval Stages of the Plymouth Brachyura. Proc. Zool. Soc. London. Part II, 473—560, 1928.
- LOHMANN, H. Beiträge zur Planktonbevölkerung der Weddellsee. Beitrag I: Allgemeines über die Fahrt, die Planktonfänge und die hydrographischen Verhältnisse in der Weddellsee. Beitrag II: Die Appendicularien-Bevölkerung der Weddellsee. Int. Revue der gesamt. Hydrobiol. u. Hydrog., XX, 1—72, 1928.
- MEEK, A. On *Sagitta elegans* and *Sagitta setosa* from the Northumbrian Plankton, with a Note on a Trematode Parasite. Proc. Zool. Soc. London, 742—76, 1928.
- MANTON, S. M. On the Embryology of a Mysid Crustacean, *Hemimysis lamornae*. Phil. Trans. Roy. Soc. London. B. 434, CXVI, 1928.
- OSTENFELD, C. H. Plankton Investigations. Rapp. et Proc. Verb. XLVII. Rapp. Jubilaire, 123—27, 1928.
- ROSSOLIMO, L. L. Planktische Infusorien des Karischen Meeres. Ber. des Wiss. Meeresinst. Moscow, Bd. II, Lfg. 2, 61—77, 1928. (In Russian, German Summary.)

#### CONDITIONS OF PRODUCTION IN THE SEA

- MOBERG, E. G. The Interrelation between Diatoms, their chemical Environment and Upwelling Water in the Sea off the coast of Southern California. Proc. Nat. Acad. Sci. XIV, 511—18. Washington 1928.

#### Marine Bacteria.

- LIEBERT, F. Der Anteil Hollands an den Arbeiten des Central-Ausschusses für Meeresforschung IV. Mikrobiologisches. Rapp. et Proc. Verb. XLVII. Rapp. Jubilaire, 222—25, 1928.

#### Bottom Deposits.

- CHAMBOST, L. Essai sur la Région Littorale dans les Environs de Salammbó. Bull. 8. Stat. Océan. de Salammbó, 1928.
- SAMOJLOFF, J. V., & KLENOVA, M. V. Contributions to the lithology of the Barents Sea, The Investigations of the Columns of Samples obtained by the Ekman's sounding-tube. Ber. des Wiss. Meeresinst. Moscow, Bd. II, Lfg. 3, 9—55, 1927. (In Russian, English Summary.)

#### Bottom Fauna.

##### GENERAL

- CHAMBOST, L. Essai sur la Région Littorale dans les Environs de Salammbó. Bull. 8. Stat. Océan. de Salammbó, 1928.
- REMY, P. Matériaux zoologiques récoltés par le *Pourquoi-Pas?* dans les Mers arctiques en 1926. Ann. des Sci. Nat. 10th Ser. II, 209—46, 1928.

- VOSMAER, G. C. J. *Bibliography of Sponges 1551—1913*. Edited by G. P. Bidder and C. S. Vosmaer-Röell. Cambridge Univ. Press 1928.
- ZENKEWITSCH, L. A. *Materialien zur quantitativen Untersuchung der Bodenfauna des Barents und des Weissen Meeres*. Ber. des Wiss. Meeresinst. Moscow, Bd. II, Lfg. 4, 1—64, 1927. (In Russian, German Summary.)

## SPECIAL GROUPS

- ALLGEN, C. *Neue oder wenig bekannte freilebende marine Nematoden von der schwedischen Westküste*. Zool. Anzeiger LXXVII, 281—307, 1928.
- CARLGREN, O. *Actinaria der deutschen Tiefsee-Expedition*. Wiss. Erg. der Deutschen Tiefsee Exp. auf dem Dampfer *Valdivia* 1898—1899. Bd. XXII, Hft. 4, 1928.
- HARANT, H. *Introduction synoptique à une faune de France des Tuniciers*. II. *Ascidies phlébobranchiatis*. III. *Ascidies aplousobranchiatis*. Bull. de l'Inst. Océan. 516, 517. Monaco 1928.
- HERON-ALLEN, E. *Barnacles in Nature and Myth*. London: Oxford Univ. Press 1928.
- JOUBIN, L. *Sur divers Céphalopodes Octopodes des croisières du Dana dans l'Atlantique*. C. R. Acad. Sci. Paris CLXXXVII, 439—41, 1928.
- MEIXNER, J. *Aberrante Kalyptorhynchia (*Turbellaria Rhabdocoela*) aus dem Sande der Kieler Bucht (1)*. Zool. Anzeiger LXXVII, 229—53, 1928.
- MONRO, C. C. A. *Polychaeta of the Families Polynoidae and Aesctidae from the vicinity of the Panama Canal, collected by Dr. C. Crossland and Dr. Th. Mortensen*, Journ. Linnean Soc. XXXVI, 553—76, 1928.
- NILSSON-CANTELL, C. A. *Studies on Cirripeds in the British Museum*. Ann. & Mag. of Nat. Hist. 10th Ser. Vol. II. 1—38, 1928.
- PERKINS, M. *A Simple Key to the Crabs (Brachyura) of Britain and the North-East Atlantic (Concluded)*. Scottish Naturalist 1928, 87—94.
- ROBSON, G. C. *Notes on the Cephalopoda V. On Grimpella, a new genus of Octopoda, with Remarks on the Classification of the Octopodidae*. Ann. & Mag. of Nat. Hist. 10th Ser. Vol. II. 108—13, 1928.
- RYLOW, W. M. *Aleyonaceae, gesammelt von der Expedition des Schwimmenden Wissenschaftlichen Meeresinstituts im Jahre 1921*. Ber. des Wiss. Meeresinst. Moscow, Bd. II, Lfg. 1, 60—78, 1928.
- SCHORYGIN, A. A. *Die Echinodermen des Weissen Meeres*. Ber. des Wiss. Meeresinst. Moscow, Bd. II, Lfg. 1, 1—59, 1926. (In Russian, German Summary.)
- TOPSENT, E. *Une Mycaline productrice de desmes *Desmatiderma arbuscula*, n. g., n. sp.*, Bull. de l'Inst. Océan. No. 519. Monaco 1928.

## Fishery Investigations.

## GENERAL

- ANON. *La revue des Travaux de l'Office des Pêches Maritimes*. La Pêche Maritime XI, 484—85, 500—01, 1928.
- BORLEY, J. O. *Les Recherches Océanographiques des pays participants et leur Rapport avec les Travaux du Conseil International*. La Grande Bretagne. I. L'Angleterre. Rapp. et Proc. Verb. XLVII. Rapp. Jubilaire, 152—70, 1928.
- BRANDT, K. *Die beiden Meereslaboratorien in Kiel*. Rapp. et Proc. Verb. XLVII. Rapp. Jubilaire, 3—16, 1928.
- BRUNELLI. *I progressi della oceanografia e i metodi di studio dei pesci utili all'alimentazione*. Bol. di Pesca, di Piscicoltura e di Idrobiologia, IV, 227—38, 1928.
- DE BUEN, O. *L'Espagne*. I. L'Adhésion au Conseil International permanent pour l'Exploration de la Mer. Rapp. et Proc. Verb. XLVII. Rapp. Jubilaire, 131—32, 1928.
- EHRENBAUM, E. *Mitarbeit bei der Internationalen Meeresforschung*. Rapp. et Proc. Verb. XLVII. Rapp. Jubilaire, 43—50, 1928.
- FARRAN, G. P. *Les Recherches Océanographiques des Pays Participants et leur Rapport avec les Travaux du Conseil International*. L'État Libre d'Irlande. Rapp. et Proc. Verb. XLVII. Rapp. Jubilaire, 183—185, 1928.
- FISCHER, E. *Die Fischereiforschungsinstitute in Deutschland (a) für Seefischerei*. Jahresber. Deutsche Fischerei, 441—48, Berlin, 1928.

- FISCHER, E. Die wichtigste Fischereiliteratur des Jahres 1927 (A) Seefischerei. Jahresber. Deutsche Fischerei, 457—63, Berlin 1928.
- GILSON, G. Les Recherches Océanographiques des Pays participants et leur Rapport avec les Travaux du Conseil International. La Belgique. Rapp. et Proc. Verb. XLVII. Rapp. Jubilaire, 63—81, 1928.
- HENKING, H. Fischereiliche und statistische Arbeiten. Rapp. et Proc. Verb. XLVII. Rapp. Jubilaire, 34—42, 1928.
- HEINRICH, C. Die Tätigkeit der Deutschen Wissenschaftlichen Kommission im Haushaltsjahr 1927. Jahresber. Deutsche Fischerei 1927, 203—16, Berlin 1928.
- HJORT, J. The first cruises with the steamship "Michael Sars". Rapp. et Proc. Verb. XLVII. Rapp. Jubilaire, 188—95, 1928.
- JOHANSEN, A. C. Fishery Research in the Waters adjacent to Denmark. Rapp. et Proc. Verb. XLVII. Rapp. Jubilaire, 87—102, 1928.
- KNUDSEN, M. Les Recherches Océanographiques des Pays participants et leur Rapport avec les travaux du Conseil International. Le Danemark. Rapp. et Proc. Verb. XLVII. Rapp. Jubilaire, 82—86, 1928.
- LÜBBERT, H. Ein praktisches Ergebnis der Internationalen Meeresforschung. Rapp. et Proc. Verb. XLVII. Rapp. Jubilaire, 51—62, 1928.
- MAGRINI, G. Recherches Océanographiques des Pays participants et leur Rapport avec les Travaux du Conseil International. L'Italie. Rapp. et Proc. Verb. XLVII. Rapp. Jubilaire, 186—87, 1928.
- MESSJATSEV, I. I. Technische Beschreibung des Expeditionsschiffes "Persey". Ber. des Wiss. Meeresinst. Moscow. Bd. I, Lfg. 1, 1—58, 1928. (In Russian, English Resumé.)
- MIELCK, W. Die biologische Anstalt auf Helgoland und die Seefischereiforschung. Rapp. et Proc. Verb. XLVII. Rapp. Jubilaire, 17—33, 1928.\*
- RAMOS DA COSTA, A., et CARLOS, M. Les Recherches Océanographiques des Pays participants et leur Rapport avec les Travaux du Conseil International. Le Portugal. Rapp. et Proc. Verb. XLVII. Rapp. Jubilaire, 244—49, 1928.
- REDEKE, H. C. Der Anteil Hollands an den Arbeiten des Central-Ausschusses für Meeresforschung. II. Die Scholle und das Plankton. Rapp. et Proc. Verb. XLVII. Rapp. Jubilaire, 212—16, 1928.
- RUSSELL, F. S., and YONGE, C. M. The Seas, our knowledge of Life in the Sea and how it is gained. Warne & Co., London & New York, 1928.
- SCHMIDT, JOHNS. Danish Fishery Investigations in the Atlantic and adjacent seas. Rapp. et Proc. Verb. XLVII. Rapp. Jubilaire, 103—22, 1928.
- SCOTLAND. Les Recherches Océanographiques des Pays participants et leur Rapport avec les Travaux du Conseil International. La Grande Bretagne. L'Écosse. Rapp. et Proc. Verb. XLVII. Rapp. Jubilaire, 171—82, 1928.
- SIEDLECKI, M. Les Recherches Océanographiques des Pays participants et leur Rapport avec les Travaux du Conseil International. La Pologne. Rapp. et Proc. Verb. XLVII. Rapp. Jubilaire. 237—43, 1928.
- SWEDEN. Le But de la Commission Hydrographique-Biologique Suédoise et son Installation. Rapp. et Proc. Verb. XLVII. Rapp. Jubilaire, 250—59, 1928.
- TESCH, J. J. Der Anteil Hollands an den Arbeiten des Central-Ausschusses für Meeresforschung. III. Fischerei-biologische Untersuchungen. Rapp. et Proc. Verb. XLVII. Rapp. Jubilaire, 217—21, 1928.

#### FOOD OF FISHES

- HERTLING, H. Untersuchungen über die Ernährung von Meeresfischen. 1. Quantitative Nahrungsuntersuchungen an Pleuronektiden und einigen anderen Fischen der Ostsee. Ber. d. deutsch. Wiss. Komm. f. Meeresunters. N. F. IV. Hft. 2, 1928.
- SCHIEMENZ, P. Wie finden die Fische ihre Nahrung? Mitt. d. Fisch. Ver. Prov. Brand. No. 5, 1928.

#### COMMERCIAL FISHERIES

- CONS. INT. POUR L'EXPLORATION DE LA MER. Bulletin statistique des Pêches Maritimes XVI pour l'année 1926, Copenhague, 1928.
- DESCHENS, M. Les Utilisations des algues et plantes marines. Bull. de la Soc. d'Océan. de France VIII, 803—16, 1928.

- EICHELBAUM, E. Die Seefischerei. Jahresber. Deutsche Fischerei 1927, 1—178, Berlin 1928.
- FISHERY BOARD FOR SCOTLAND. Forty-sixth Annual Report of the Fishery Board for Scotland. Being for the year 1927. H. M. S. O. 1928.
- LUNDBECK, J. Vergangenheit und Zukunft der ostpreussischen Seefischerei. Mitt. d. deutsch. Seefisch-Vereins. XXXIV, 318—28, 1928.
- MINISTRY OF AGRICULTURE & FISHERIES. Report on Sea Fisheries for the year 1927. Ministry of Agriculture & Fisheries, London, 1928.
- SOMOV, M. P. Work on the Study of the Condition of the Trawling Industry in the Barents Sea in the Spring of 1925. Festschrift für Prof. N. M. Knipowitsch, 1885—1925, 361—98, Moscow 1927. (In Russian.)
- ZIRKEL. Eine Studienreise nach Holland. Mitt. d. deutsch. Seefisch. Vereins. XXXIV, 331—36, 1928.

### Fishes.

#### GENERAL

- ALPATOV, W. W., and BOSCHKO-STEPANENKO. Variation and Correlation in Serially situated organs in Insects, Fishes and Birds. American Naturalist LXII, 409—24, 1928. (Deals with *Boreogadus*.)
- EVANS, H. M., and DAMANT, G. C. C. Observations on the Physiology of the Swim Bladder in Cyprinoid Fishes. Brit. Journ. Expt. Biol. VI, 42—55, 1928.
- FARMER, K. Das Seelenleben der Fische. München 1928.
- GUDGER, E. W. The Distribution of *Rubellus*, the oil fish. American Naturalist LXII, 467—77, 1928.
- HICKLING, C. F. The Exploratory Voyages of the "Florence Brierley". Notes on the Fish recorded. Ann. & Mag. of Nat. Hist. 10th Ser. II, 196—209, 1928.
- JOUBIN, L., et LE DANOIS, E. Catalogue illustré des Animaux marins comestibles des côtes de France et des mers limitrophes. Index Alphabétique dressé par Mme G. Belloc. Mémoires (Série Spéciale). 8. Office Scient. et Techn. des Pêches Maritimes. 1928.
- KEYS, A. B. Marking living Fishes for Experimental Purposes. Science XLVIII, 18, 1928.
- KÜNNE, CL. Über die Verbreitung der Seeadeln (*Syngathidae*) in der deutschen Nordsee. Zool. Anzeiger LXXII, 321—24, 1928.
- MAGNAN, A., et SAINTE-LAGRIE, A. Sur l'équilibre statique des Poissons. C. R. Acad. Sci. Paris CLXXXVII, 388—90, 1928.
- MAGNAN, A., et SAINTE-LAGRIE, A. Sur une méthode de morphométrie des Poissons. C. R. Acad. Sci. Paris. CLXXXVII, 1316—18, 1928.
- MARCELET, H. Présence d'un acide gras, non encore observé, dans une huile de Poisson. C. R. Acad. Sci. Paris CLXXXVII, 145—6, 1928.

#### PLAICE AND OTHER PLEURONECTIDS

- ALTNÖDER, R. Beitrag zum Rückgang der Plattfischerei in der westlichen Ostsee. Mitt. des deutsch. Seefisch. Vereins. XXXIV, 329—30, 1928.
- ANDERSSON, K. A., and MOLANDER, A. R. The plaice fishery and the plaice in the Arcona Basin and the Bornholm Area (Southern Baltic) during the period 1921—1927. Rapp. et Proc. Verb. XLVIII, 19—30, 1928.
- BLEGVAD, H. On the influence of the fishery upon the stock of plaice in the Baltic proper. Rapp. et Proc. Verb. XLVIII, 31—50, 1928.
- HERTLING, H. Untersuchungen über die Ernährung von Meeresfischen. 1. Quantitative Nahrungsuntersuchungen an Pleuronektiden und einigen anderen Fischen der Ostsee. Ber. d. deutsch. Wiss. Komm. f. Meeresf. N. F. IV. Hft. 2, 1928.
- JENSEN, A. J. C. An Investigation on the Stock of Plaice in the Southern Horns Reef Area in the Years 1925 and 1927. Medd. fra Komm. for Havunders. Ser. Fiskeri. VIII, No. 6, 1928.
- JOHANSEN, A. C. Om den foretagne Omplantning af Rødspætter fra Nissum Bredning og Nordsøen til vore indre Farvande. Dansk Fiskeritidende. 1928, 299—301.
- JOHANSEN, A. C. On a proposed close season for the plaice fishery in the Belt Sea and the Baltic. Rapp. et Proc. Verb. XLVIII, 51—68, 1928.
- MEEK, A. Variations in and the Migrations of the Flounder *Pleuronectes flesus*. Festschrift für Prof. N. M. Knipowitsch, 1885—1925, 77—82, Moscow 1927.

- STRODTMANN, S. The State of the plaice fishery in the Western Baltic and the Baltic proper. Rapp. et Proc. Verb. XLVIII, 68—78, 1928.
- THURSBY-PELHAM, D. E. Changes in the Stock of Plaice in the Southern North Sea. Fishing News, 30—31, 27-X-1928.

## HALIBUT

- REPORT of the International Fisheries Commission appointed under the Northern Pacific Halibut Treaty, Ottawa, 1928.

## COD

- LIPIN, A. N. Über die Rassen des Dorschen von Kanin aus den Fängen von 1923. Rep. Scient. Inst. of Fisheries, Moscow R. S. F. S. P. II, 4, 31—46, 1928. (In Russian.)
- LUNDBECK, J. Beobachtungen über Missbildungen und Erkrankung von Dorschen an der ostpreussischen Küste. Zts. f. Fischerei XXVI, 457—72. Neudamm & Berlin 1928.
- SETTE, O. E. Statistics of the Catch of Cod off the East Coast of North America to 1926. App. IX to the Rep. of the U. S. Comm. of Fisheries for 1927, 737—48, 1928.

## TUNNY

- HELDT, H. Le Thon Rouge (*Thunnus Thynnus* L.) Progrès des recherches sur la question. Bull. 9. Stat. Océan. de Salammbô 1928.

## HERRING

- ALTNÖDER, K. Untersuchungen an den Heringen der westlichen Ostsee und Bericht über die Untersuchungsfahrt zur Feststellung des Vorkommens von Herbstheringslarven in der Laichperiode 1927. Ber. des Deutsch. Wiss. Komm. für Meeresforschung. N. F. IV, 125—94, 1928.
- HODGSON, W. C. Some spawning Places of the Herring of the Southern North Sea. Journ. du Cons. III, 224—30, 1928.
- LISSNER, H. Die gegenwärtige Lage der deutschen Grossen Heringsfischerei. Der Fischerbote XX, 265—70, 1928.
- MOROSOW, A. W. Beiträge zur Systematik der Kaspischen Heringe. 1) Anwendung der Methode kombinierter Merkmale (Heincke) zur Bestimmung der Wolga-Kaspischen Heringe. 2) Die Heringe des südöstlichen Kaspisees (Turkmenien). 3) Biometrische Analyse der Systematik der Wolga-Kaspischen Heringe. Rep. Scient. Inst. of Fisheries Moscow R. S. F. S. P. II, 4, 47—96, 1928. (In Russian, German Summary.)
- RENESE, P. VAN. Die holländische Heringskontrolle. Die Fischwirtschaft IV, 85—88, 1928.

## PILCHARD, SPRAT

- ANON. La technique de la pêche à la sardine au Portugal. La Pêche Maritime XI, 545—46, 1928.
- ARNE, P. Note sur les sardines de la région de Saint-Jean-de-Luz. Bull. de la Soc. Océan. de France VIII, 794—98, 1928.
- DE BUEN, F. Biología y pesca de la sardina. *Sardina pilchardus* (Walbaum). II. Pesca con Cerco real. Boletín de Pesca XIII, 261—77, 1928.
- CASSIGNEUL, P. La recherche des bancs de sardines par hydravions. La Pêche Maritime XI, 563, 1928.
- LE GALL, J. Notes et Observations sur la Biologie de la Sardine de la Manche. Journ. du Cons. III, 206—23, 1928.

## MACKEREL

- QUIBBON. Predicting the Mackerel Fishery. Fish Trades Gazette 21, 30-VI-1928.

## EELS

- HELDT, H. Premières captures de Civelles dans le Lac de Tunis. Notes, No. 9. Stat. Océan. de Salammbô, 1928.



## SKATES, RAYS, DOGFISH

HUGENARD, E., et MAGNAN, A. Sur la production d'électricité par les Torpilles. C. R. Acad. Sci. Paris CLXXXVI, 1863—65, 1928.

## FRESHWATER FISH AND POLLUTION

- ALM, G. The Salmon in the Baltic Area of Sweden. Rapp. et Proc. Verb. XLVIII. 81—100, 1928.
- ALM, G. Der Lachs (*Salmo salar* L.) und die Lachszucht in verschiedenen Ländern. Arch. f. Hydrobiol. XIX, 247—94, 1928.
- BUTCHER, R. W., PENTELOW, F. T. K. and WOODLEY, J. W. A. The diurnal variation of the gaseous constituents of river waters, Part III. Biochemical Journ. XXII, 1035—47, 1928.
- HENKING, H. Remarks concerning the question of a size limit for salmon and sea-trout. Rapp. et Proc. Verb. XLVIII, 101—2, 1928.
- JÄRVI, T. H. Remarks as to the question about size limit for the salmon in the Baltic. Rapp. et Proc. Verb. XLVIII, 103—104, 1928.
- MANNSELD, W. The occurrence and catch of Salmonids in the Latvian coastal and inland waters. Rapp. et Proc. Verb. XLVIII, 105—10, 1928.
- POULSEN, E. M. Remarks on the Salmon and Sea-trout off the Baltic coasts of Denmark. Rapp. et Proc. Verb. XLVIII, 111—18, 1928.
- SIEDLECKI, M. Remarks relative to the question of the salmon and sea-trout fishery in Poland. Rapp. et Proc. Verb. XLVIII, 119—25, 1928.

## Oysters and other Lamellibranchs.

- ANON. Testing Spawning Oysters. Fish Trades Gazette, 17, 14-VII-1928.
- GALTSOFF, P. S. Experimental Study of the Function of the Oyster Gills and its bearing on the Problems of Oyster Culture and Sanitary Control of the Oyster Industry. Bull. Bureau of Fisheries U. S. A. XLIV, 1—39, 1928.
- HAVINGA, B. The Daily Rate of Growth of Oysters during Summer. Journ. du Cons. III, 231—45, 1928.
- NELSON, T. C. Pelagic Dissoconchs of the Common Mussel *Mytilus edulis*, with observations on the Behaviour of the Larvae of Allied Genera. Biol. Bull. Mar. Lab. Woods Hole, Mass. LV, 180—92, 1928.
- ORTON, J. H. Transplantation of the European Oyster. Science LXVII. 582—83, 1928.
- ORTON, J. H. Oysters and Black Sickness — An Economic Method of Testing. Fish Trades Gazette, 34, 30-VI-1928.
- ORTON, J. H. The Native Oyster. Intensity of Spawning Periods. Fish Trades Gazette, 41, 7-VII-1928.
- ORTON, J. H., and WINCKWORTH, R. The Occurrence of the American Oyster Pest *Urosalpinx cinerea* (Say) on English Oyster Beds. Nature CXXII, 241, 1928.
- ROUGHLEY, T. C. The Dominant Species of *Ostrea*. Nature CXXII, 476—77, 1928.
- YONGE, C. M. Structure and Function of the Organs of Feeding and Digesting in the Septibranchs, *Cuspidaria*, and *Poromya*. Phil. Trans. Roy. Soc. London, B. 434, CXVI, 1928.

## Crustacea.

- COLLINS, R. M. A Life History of the Crab. Fish Trades Gazette, 38, 25-VIII-28.
- JOUBIN, L., et LE DANOIS, E. Catalogue illustré des Animaux Marins comestibles des côtes de France et des mers limitrophes. Index Alphabétique dressé par Mme. G. Belloc. Mémoires (Série Spéciale). 8. Office Scient. et Techn. des Pêches Maritimes. 1928.

## Whales and Seals.

- BOULENGER, E. G. Harvest of Whale Fisheries. The Fishing News. 34, 22-IX-1928.
- DOROFEEV, S. W. und FREIMANN, S. J. Versuch einer Zählung der Bestände der Weissmeerherde des Grönländischen Seehunds mit Hilfe aerophotographischer Aufnahmen. Rep. Scient. Inst. of Fisheries Moscow, R. S. F. S. P., II, 4, 5—30, 1928. (Russian, German Summary.)

- HARDY, A. C. The Work of the Royal Research Ship "*Discovery*" in the Dependencies of the Falkland Islands. The Geographical Journal, LXXII, 209—34, London 1928.
- NYBELIN, O. Zwei neue Cestoden aus Bartenwalen. Zool. Anz. LXXXVIII, 309—14, 1928.
- THOMPSON, D'ARCY W. On Whales landed at the Scottish Whaling Stations during the years 1908—1914 and 1920—1927. Fish. Board for Scot. Sci. Invest. 1928, III.

**Biological-Miscellaneous.**

- DOGEL, V. A. The Dependence of the Distribution of Parasites on the mode of Life of the Animal Hosts. Festschrift für Prof. N. M. Knipowitsch, 1885—1925, 17—44, Moscow 1927. (In Russian.)
- ISSAITSCHIKOW, I. M. Zur Kenntnis der parasitischen Würmer einiger Gruppen von Wirbeltieren der russischen Arktis. Ber. des Wiss. Meeresinst. Moscow, Bd. III, Lfg. 2, 1—79, 1928. (In Russian.)
- ORTON, J. H. Imperishable Labels for Preserved Organisms. Nature CXXII, 57, 1928.

=====
